# Supplementary material for: The Mating Competence of Geographically Diverse Leishmania major Strains in Their Natural and Unnatural Sand Fly Vectors
Source: PubMed Central journal article supplement (PMC3723561; doi:10.1371/journal.pgen.1003672), 2013-07-25

Fig S3

Fn/Sat X Sd/Hyg  
LmjF.34.0080

Fn/Sat X Lv39/Hyg  
LmjF.31.0020

Sd/BsdX Lv39/Hyg  
LmjF.35.0050

Ry/Sat X Lv39/Hyg  
LmjF.21.0040

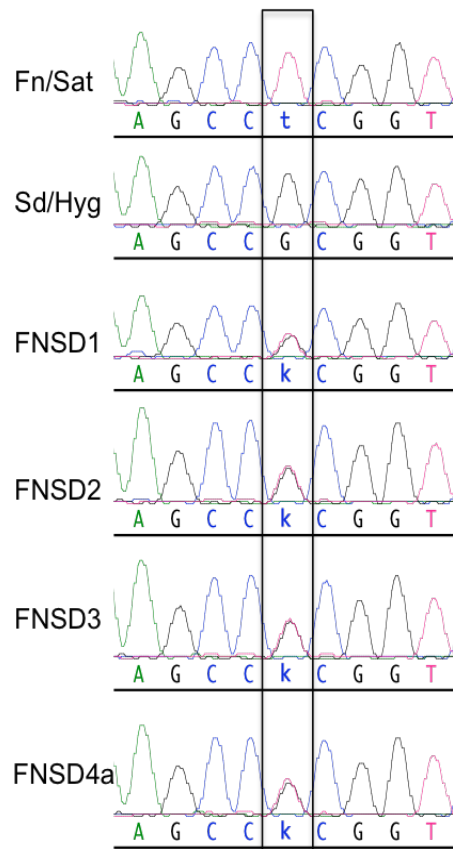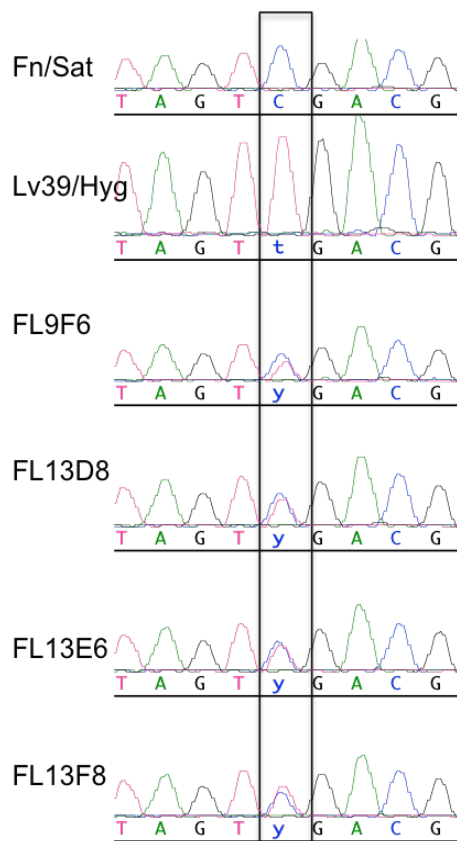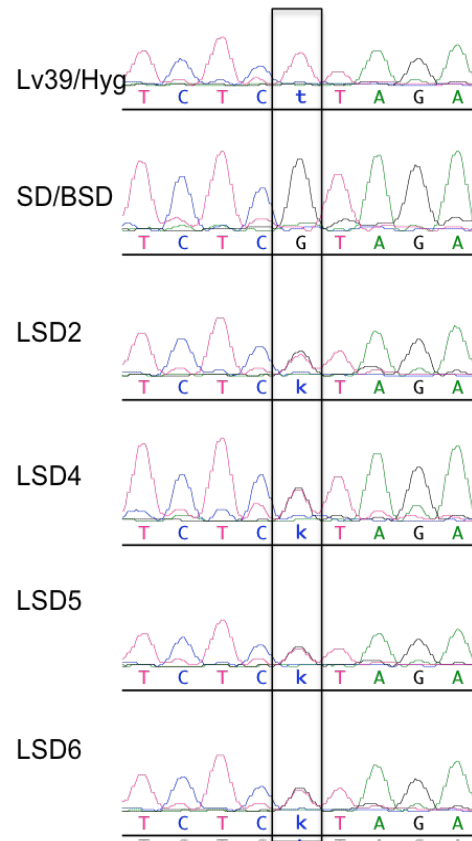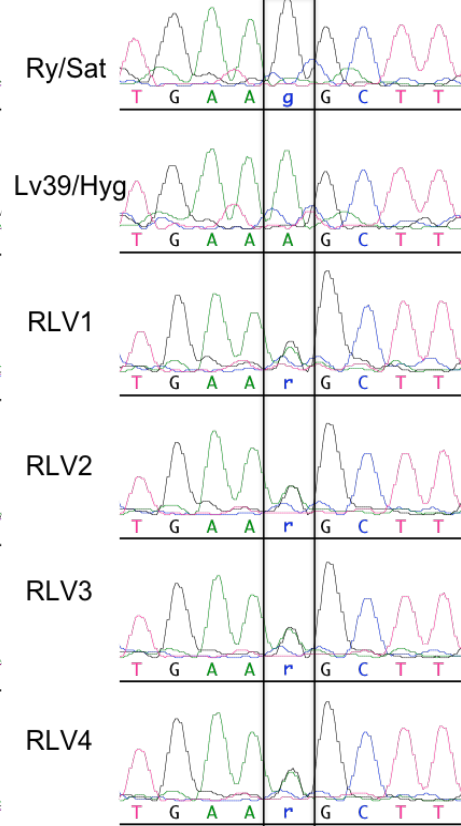

Supplement: pgen.1003672.s003.pdf [file pgen.1003672.s003.pdf]
