# Supplementary material for: The Mating Competence of Geographically Diverse Leishmania major Strains in Their Natural and Unnatural Sand Fly Vectors
Source: PubMed Central journal article supplement (PMC3723561; doi:10.1371/journal.pgen.1003672), 2013-07-25

Fig S7

A

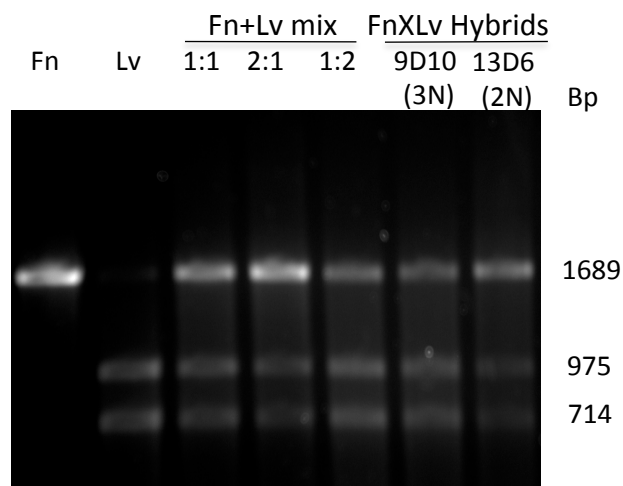

B

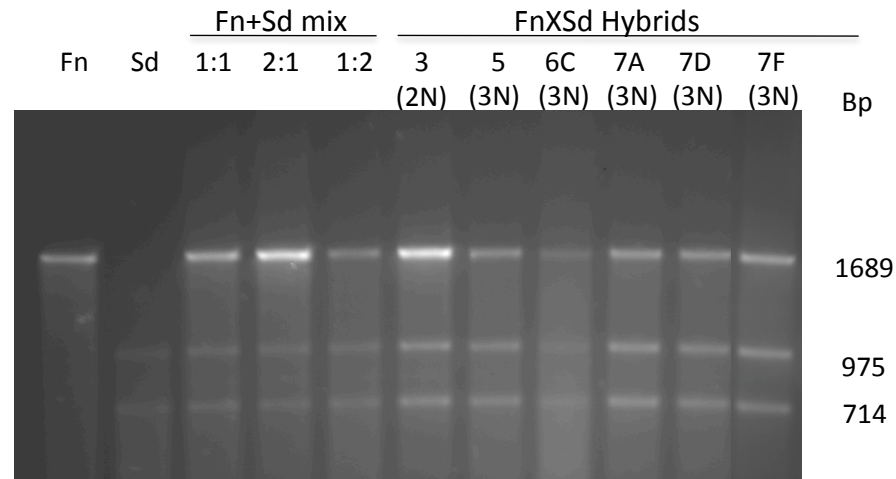

C

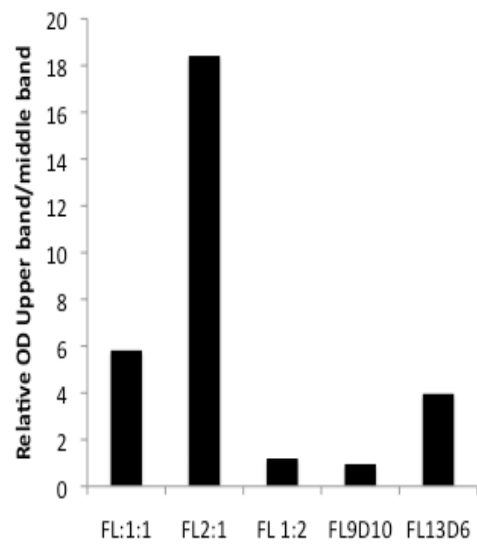

D

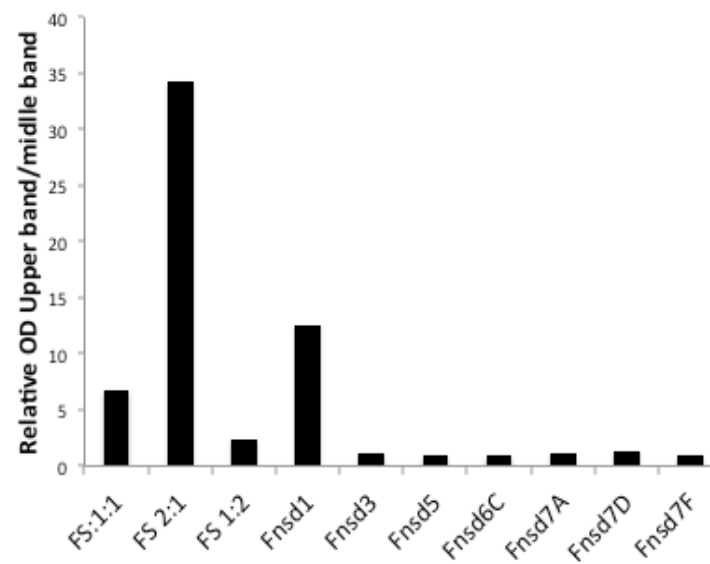

Supplement: pgen.1003672.s007.pdf [file pgen.1003672.s007.pdf]
