# Supplementary material for: The Mating Competence of Geographically Diverse Leishmania major Strains in Their Natural and Unnatural Sand Fly Vectors
Source: PubMed Central journal article supplement (PMC3723561; doi:10.1371/journal.pgen.1003672), 2013-07-25
Supplement: pgen.1003672.s008.pdf [file pgen.1003672.s008.pdf]

**Table S1. PCR primers and conditions**

| Gene ID              | Chr | Chromosomal location | Fwd primer                   | Rev primer                   | Fragment length (bp) | Annealing Temp(°C) | Ref                   |
|----------------------|-----|----------------------|------------------------------|------------------------------|----------------------|--------------------|-----------------------|
| Hygromycin B (Hyg)   | 24  | nd                   | ATGAAAAGCCTG<br>AACTCACC     | CTATTCCTTTGCC<br>CTCGG       | 1029                 | 62                 | This work             |
| Nourseothricin (Sat) | 27  | nd                   | ATGAAGATTTTCG<br>GTGATCCC    | TTAGGCGTCATC<br>CTGTGC       | 525                  | 68                 | This work             |
| Blasticidin (Bsd)    | 18  | nd                   | ATGCCTTTGTCTC<br>AAGAAGAATC  | TTAGCCCTCCCA<br>CACATAAC     | 393                  | 68                 | This work             |
| LmjF.02.0085         | 2   | 28965-<br>29909      | ATGCCGCGCCGA<br>TACAGACACAT  | CTGCTTCAGCCA<br>TGATGCACGC   | 922                  | 71.5               | [13]                  |
| LmjF04.0070          | 4   | 29378-<br>30900      | CGRCTAGAAACG<br>CAGAGTAC     | CACGTGATCTGC<br>ACAAACAC     | 599                  | 60                 | This work             |
| LmjF09.0740          | 9   | 288100-<br>289100    | TACAGGGTGGAG<br>AGRTCYAT     | GCATGCTGCAGT<br>ACCTKTTG     | 637                  | 60                 | This work             |
| LmjF10.0290*         | 10  | 130280-<br>131280    | TACTTYGACCTCA<br>GCGTGAC     | GATGGTGTCTT<br>CGTCGTC       | 518                  | 60                 | This work<br>and [18] |
| LmjF14.0130          | 14  | 32470-<br>33230      | GAATGGAGAACM<br>TSGGCAAG     | GAAGCGATCCAG<br>AATGCTST     | 739                  | 60                 | This work<br>and [18] |
| LmjF21.0040          | 21  | 16381-<br>17118      | TGGCGCCGTCTA<br>CCTGCGAC     | GAATGCGTTGAG<br>AGCGTCTG     | 578                  | 55                 | [13]                  |
| LinJ.25.2530         | 25  | 872123 -<br>872908   | ATGGCGGAGCTC<br>CTTAGCAAAAAG | CCATCTTTGCTG<br>GGTCCTTG     | 778                  | 68                 | [13]                  |
| LmjF31.0020          | 31  | 7700-<br>8700        | AAGAACATGCCRA<br>RAAGGGC     | CCGAGTTCTTCG<br>GMWCGTTT     | 700                  | 60                 | This work             |
| LmjF.31.3150         | 31  | 1465014-<br>1469423  | GAAAGCTGATGAA<br>GCTGCTGGA   | CTAGCGCGTCTG<br>CTTCGACACAAC | 530                  | 55                 | [13]                  |
| LmjF.31.3110         | 31  | 1454006-<br>1456546  | GCTCTGTGCGGAA<br>GCGTATCCC   | CTAGCAGCACGC<br>GCTCTTCACCT  | 749                  | 71.5               | [13]                  |
| LmjF.34.0080         | 34  | 26530-<br>27530      | GATYCGMGAGAA<br>GGAGAATG     | CGGTCGTTGTTG<br>ATGTTGAG     | 684                  | 60                 | This work<br>and [18] |
| LmjF.35.0050         | 35  | 17610-<br>18710      | ATGCGTCGCCTCT<br>TTGATGCCTC  | AAGTGCACCAG<br>GACTTGATAGC   | 1100                 | 71.5               | [13]                  |
| LmjF.35.3340         | 35  | 1363367-<br>1364500  | TGTGAGCHTGGCR<br>AGAATCT     | GTATCAACAACGC<br>TGGGGAGT    | 697                  | 60                 | This work<br>and [18] |

|                       |                |             |                                |                             |      |      |           |
|-----------------------|----------------|-------------|--------------------------------|-----------------------------|------|------|-----------|
| LmjF.36.0050          | 36             | 17464-19125 | ATGTCGTCAGAGG<br>AGAAGTTAACAGC | GATTGGTGTAGT<br>TCGGTGCGTG  | 1018 | 71.5 | [13]      |
| CYTB <sup>Δ</sup>     | Maxi<br>circle | 5403-6481   | AGCGGAGAGRAR<br>AGAAAAGG       | GYTCRCAATAAA<br>ATGCAAATC   | 618  | 60   | This work |
| 12S rRNA <sup>Δ</sup> | Maxi<br>circle | 438-1610    | AACTARTGAWGG<br>CACAGTTGTCT    | ACCCAATAACG<br>AATTGCWTTT   | 818  | 59   | This work |
| Nd5 <sup>Δ</sup>      | Maxi<br>circle | 15626-15645 | GAYGCDATGGAAG<br>GACCDAT       | CCACAYAAAAAY<br>CAYAANGAACA | 456  | 59   | This work |

Δ - Genbank: M10126.1; nd, not determined
