# Supplementary material for: The Mating Competence of Geographically Diverse Leishmania major Strains in Their Natural and Unnatural Sand Fly Vectors
Source: PubMed Central journal article supplement (PMC3723561; doi:10.1371/journal.pgen.1003672), 2013-07-25
Supplement: pgen.1003672.s009.pdf [file pgen.1003672.s009.pdf]

**Table S2. SNP positions and descriptions**

| <b>Chromosome</b>          | <b>Locus/<br/>chromosome</b> | <b>Number of<br/>analyzed<br/>SNPs/ locus</b> | <b>SNP Position/<br/>description</b> |
|----------------------------|------------------------------|-----------------------------------------------|--------------------------------------|
| <b>Fn/Sat x Sd/Hyg</b>     |                              |                                               |                                      |
| 14                         | LmjF14.0130                  | 1                                             | 370/ F=G S=A                         |
| 34                         | LmjF.34.0080                 | 2                                             | 777/ F=C S=T<br>975/ F=T S=G         |
| 35                         | LmjF35.3340                  | 1                                             | 660/F=C S=R*                         |
| 36                         | LmjF36.0050                  | 1                                             | 390/ F=C S=T                         |
| Maxicircle                 | 12SrRNA                      | 1                                             | 458/ F=A S=C                         |
|                            | ND-5                         | 1                                             | 831/ F=G S=A                         |
| <b>Fn/Sat x Lv39c5/Hyg</b> |                              |                                               |                                      |
| 4                          | LmjF.04.0070                 | 1                                             | 465/ F=T L=C                         |
| 10                         | LmjF.10.0290                 | 1                                             | 657/ F=C L=T                         |
| 31                         | LmjF.31.0020                 | 1                                             | 700 F=C L=T                          |
| 34                         | LmjF.34.0080                 | 2                                             | 777/ F=C L=T<br>975/ F=T L=G         |
| 35                         | LmjF.35.0050                 | 1                                             | 816/ F=T L=C                         |
| Maxicircle                 | 12SrRNA                      | 1                                             | 456/ F=A L=C                         |
|                            | CYTB                         | 1                                             | 106/ F=G L=A                         |
| <b>Lv39c5/Hyg x Sd/BSD</b> |                              |                                               |                                      |
| 2                          | LmjF.02.0085                 | 2                                             | 739/ S=A L=G<br>608/ S=G L=C         |
| 9                          | LmjF09.0740                  | 1                                             | 6360/ S=C L=T                        |
| 21                         | LmjF.21.0040                 | 1                                             | 345/ S=G L=A                         |
| 31                         | LmjF.31.3110                 | 1                                             | 2103/ S=G L=A                        |
| 35                         | LmjF.35.0050                 | 1                                             | 727/ S=G L=T                         |
| 36                         | LmjF.36.0050                 | 1                                             | 282/ S-T L=C                         |
| Maxicircle                 | ND-5                         | 1                                             | 831/ S=A L=G                         |
|                            |                              |                                               | 958/ S=C L=T                         |
| <b>Ry/Sat x Lv39c5/Hyg</b> |                              |                                               |                                      |
| 21                         | LmjF21.0040                  | 1                                             | 345/ R=G L=A                         |
| 25                         | LmjF.25.2420                 | 1                                             | 264/ R=A L=G                         |
| 31                         | LmjF.31.3150                 | 1                                             | 4122/ R=G L=T                        |
| 35                         | LmjF35.0050                  | 1                                             | 727/ R=G L=T                         |
| 36                         | LmjF36.0050                  | 1                                             | 632/ R=A L=G                         |
| Maxicircle                 | ND-5                         | 2                                             | 909/ R=C L=T                         |
|                            |                              |                                               | 1080/ R=C L=T                        |
|                            | CYTB                         | 2                                             | 352/ R=C L=T<br>495/ R=T L=C         |

Position of SNPs in the maxicircle genes refer to *L. tarentolae* kDNA. Genbank: M10126.1
